# Supplementary material
Source: publisher figshare collection journal article supplement (https://acs.figshare.com/ndownloader/files/14362886)
Supplement: Supplementary file 1 [file 14362886]

## Supporting Information

### Synthesis, Characterization and Biomedical Applications of an Alkylated Quercetin-Gadolinium Complex

Sathyasivam Kaviarasi,<sup>1,2</sup> K. S. Shalini Devi,<sup>1,2</sup> Perumal Vinoth,<sup>2</sup> Vellaisamy Sridharan,<sup>3</sup> Eiji Yuba,<sup>4</sup> Atsushi Harada,<sup>4</sup> Uma Maheswari Krishnan,<sup>1,2,\*</sup>

<sup>1</sup>Centre for Nanotechnology & Advanced Biomaterials, SASTRA Deemed University

<sup>2</sup>School of Chemical & Biotechnology, SASTRA Deemed University

<sup>3</sup>Department of Chemistry and Chemical Sciences, Central University of Jammu, Jammu

<sup>4</sup>Osaka Prefecture University, Japan

\*Corresponding Author

**Prof. Uma Maheswari Krishnan Ph. D.**

Dean, School of Arts, Science & Humanities (SASH)

Professor, Centre for Nanotechnology & Advanced Biomaterials (CeNTAB)

School of Chemical & Biotechnology

SASTRA Deemed-to-be University, Thanjavur – 613 401

Tamil Nadu, India.

Ph.: (+91) 4362 264101 Ext: 3677

Fax: (+91) 4362 264120

E-mail: [umakrishnan@sastra.edu](mailto:umakrishnan@sastra.edu)

#### Details of supporting information:

Number of pages: 7

Number of supporting figures: 6

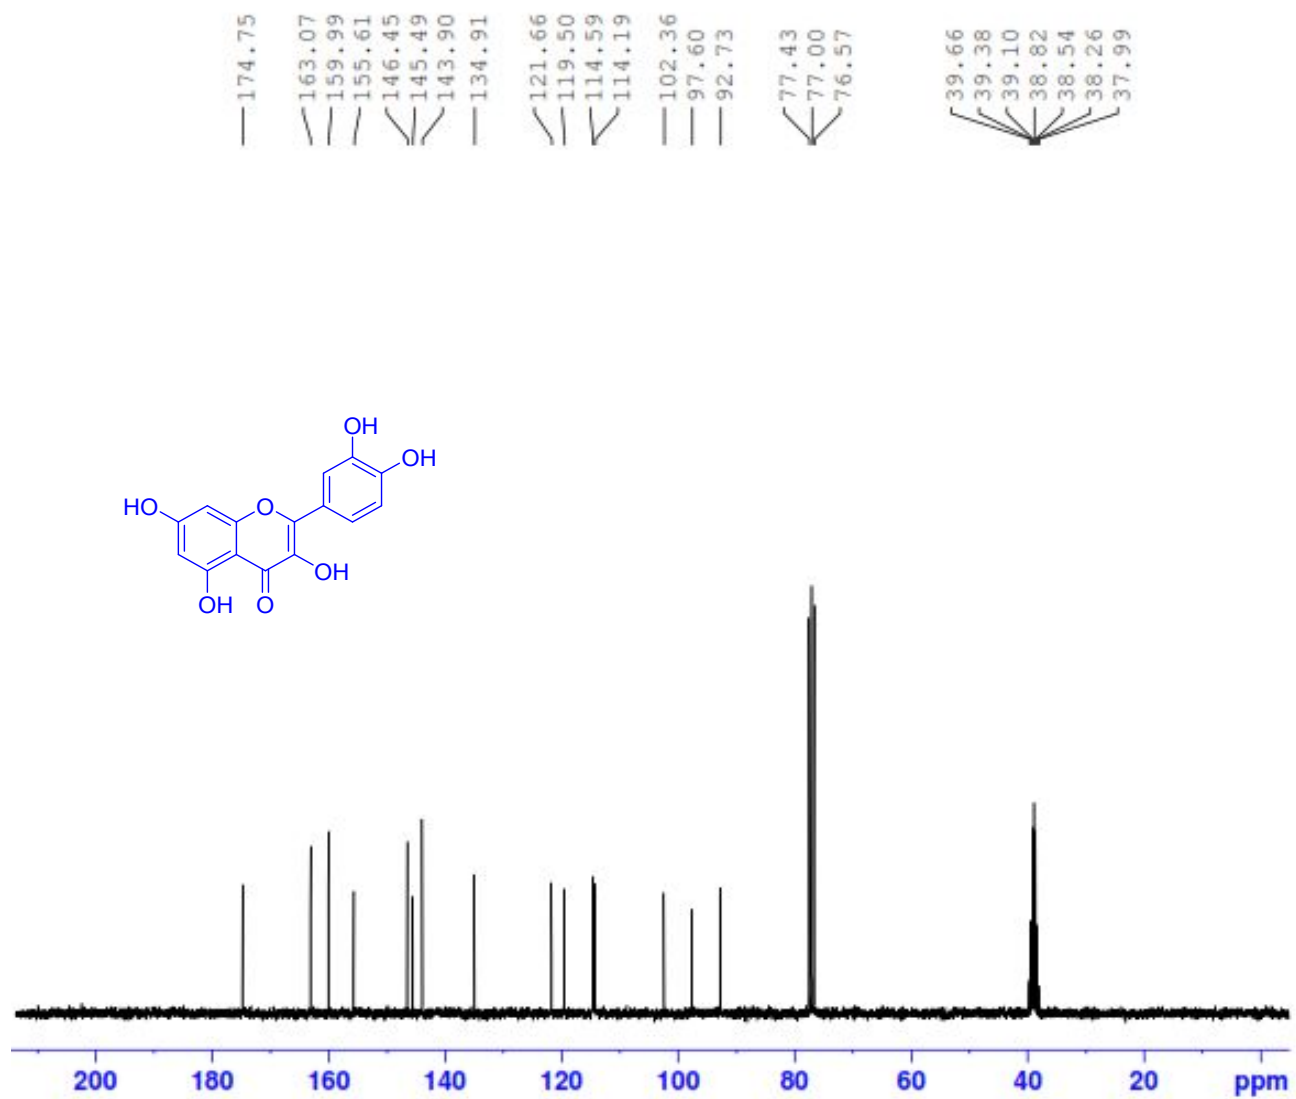

**Figure S1:** The  $^{13}\text{C}$  NMR of the intermediate A (Quercetin dihydrate)

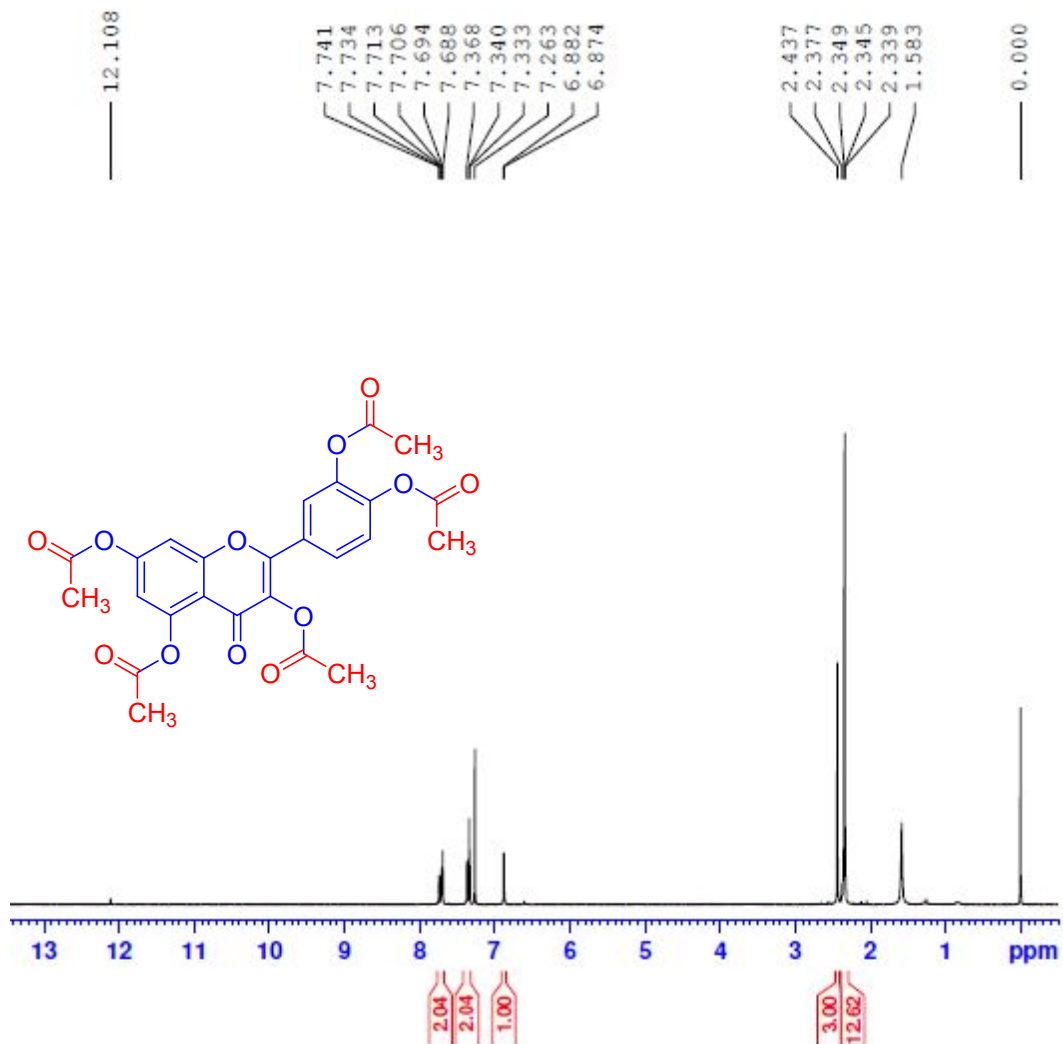

**Figure S2:** The <sup>1</sup>H NMR of the Compound B [2-(3,4-diacetoxyphenyl)-4-oxo-4H-chromene-3,5,7-triyl triacetate]

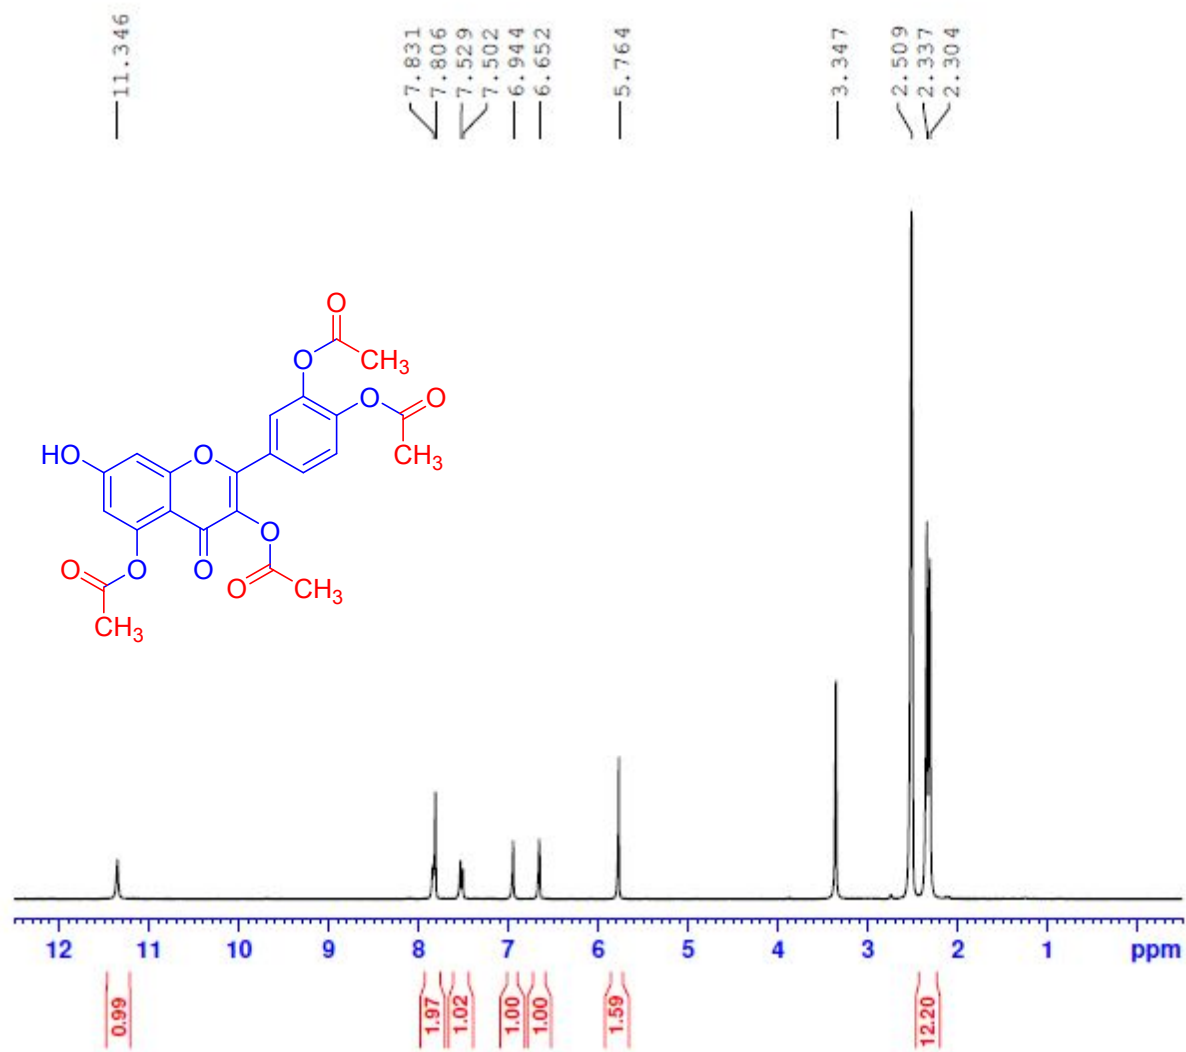

**Figure S3:** The <sup>1</sup>H NMR of the Compound C [4-(3,5-diacetoxy-7-hydroxy-4-oxo-4H-chromen-2-yl)-1,2-phenylene diacetate]

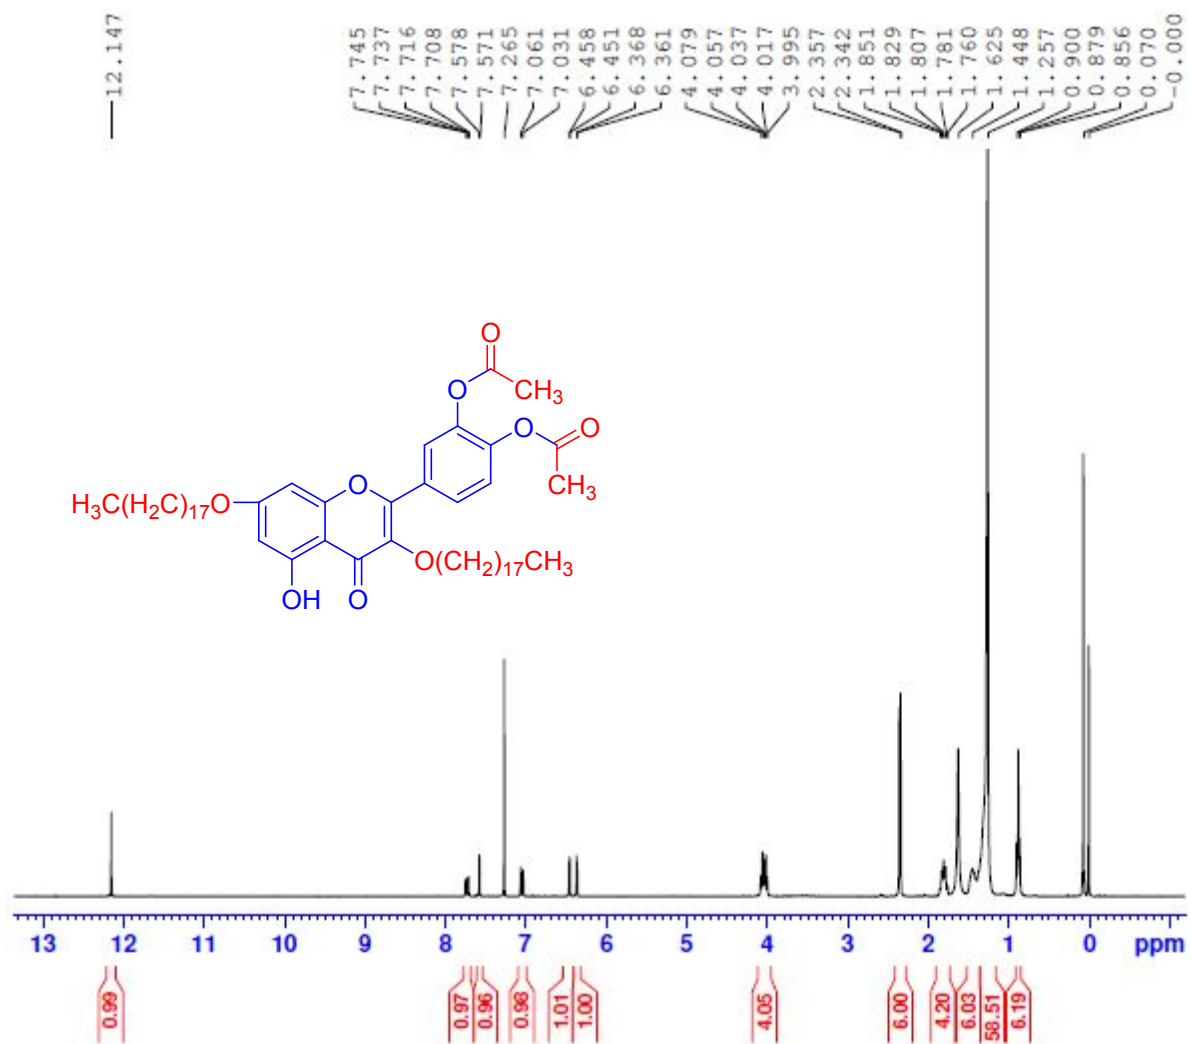

**Figure S4:** The <sup>1</sup>H NMR of the compound D [4-(5-hydroxy-3,7-bis(octadecyloxy)-4-oxo-4H-chromen-2-yl)-1,2-phenylene diacetate]

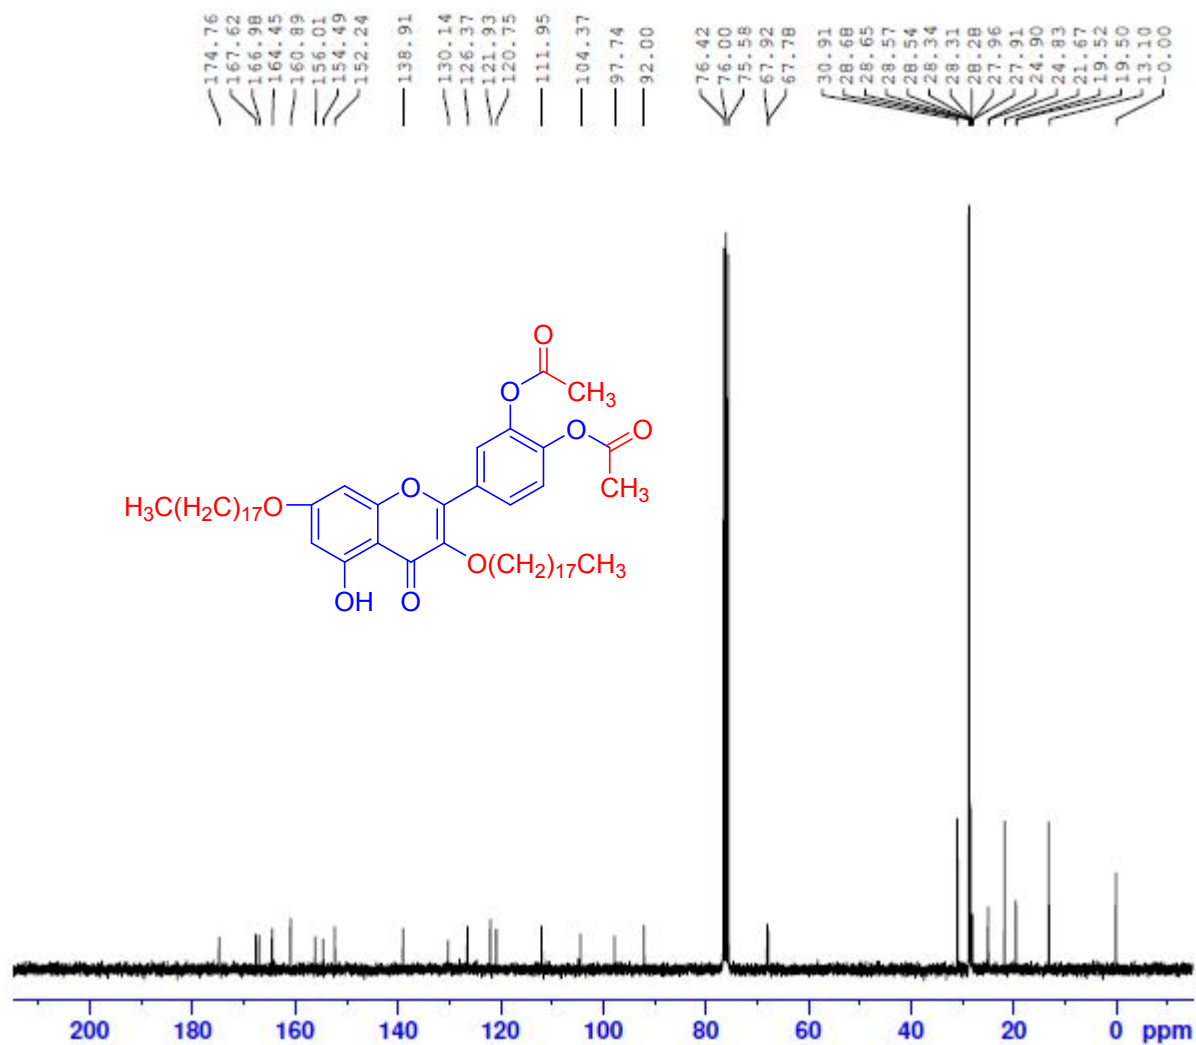

**Figure S5:** The <sup>13</sup>C NMR of the compound D [4-(5-hydroxy-3,7-bis(octadecyloxy)-4-oxo-4H-chromen-2-yl)-1,2-phenylene diacetate]

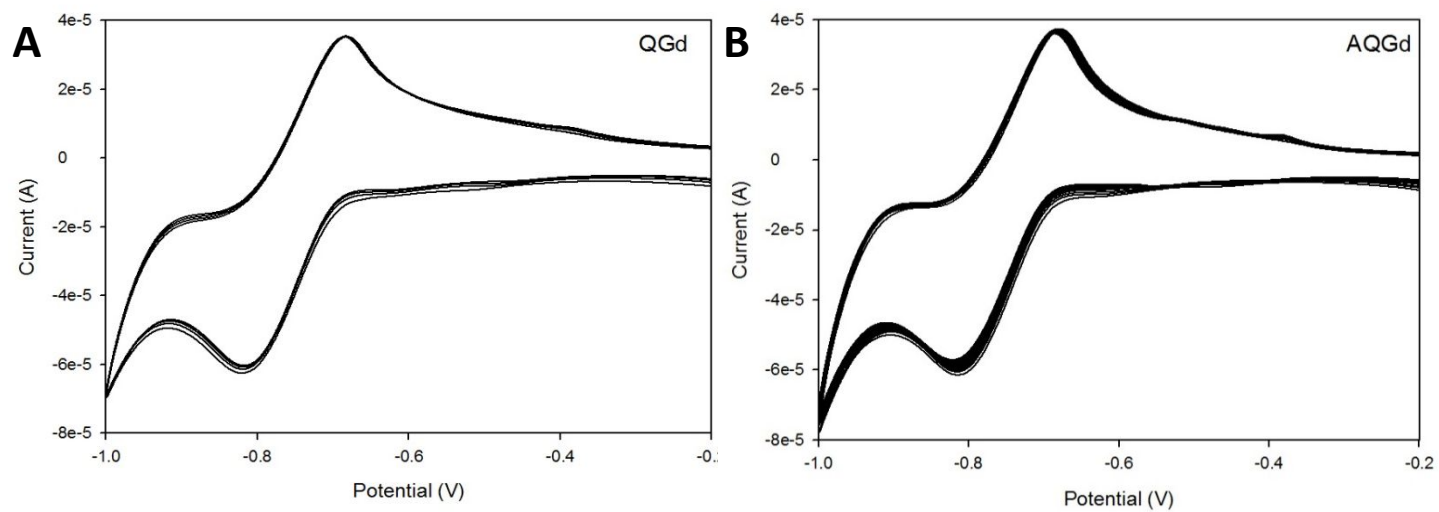

**Figure S6: Cyclic stability of QGd/GCE and AQGd/GCE in PBS**
